# Supplementary material for: Microfluidic platform for chemotaxis in gradients formed by CXCL12 source-sink cells
Source: Royal Society of Chemistry journal article supplement (doi:10.1039/c0ib00041h), 2010-01-01
Supplement: c0ib00041h.pdf [file c0ib00041h.pdf]

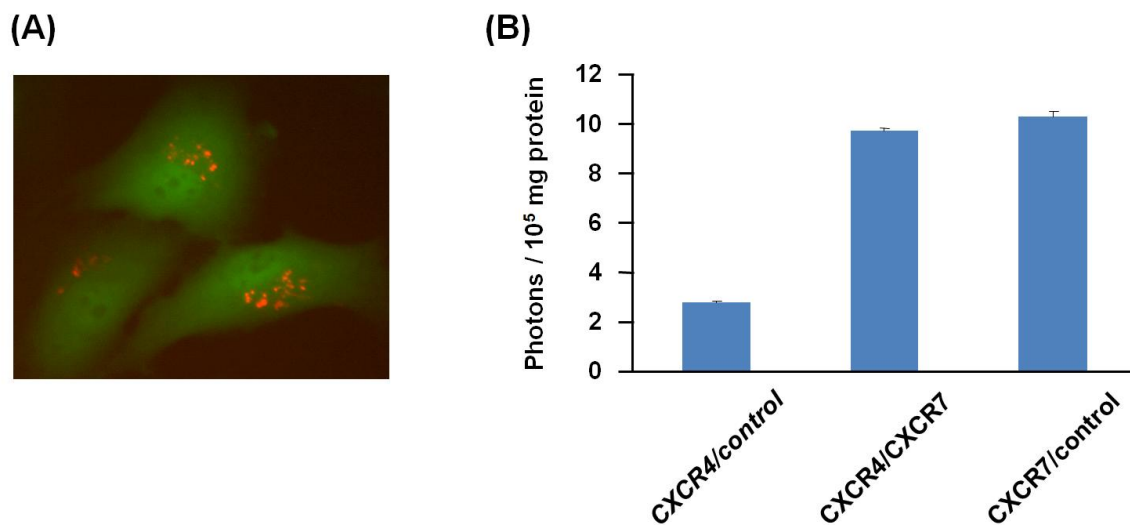

**Supplementary Figure 1.** X7 cells accumulate CXCL12-cherry. (A) Uptake of CXCL12-cherry (red) in X7 cells (green) was observed by fluorescence microscopy (40X objective). (B) CXCR7-dependent uptake rate of CXCL12 was quantified by a bioluminescent measurement.
